# Supplementary material for: The Sequential Change in Left Ventricular Function among Various Cardiovascular Diseases: A 12-Year Study
Source: MDPI journal article supplement (doi:10.3390/jpm12030415), 2022-03-07
Supplement: s1 [file s1]

**Supplementary Table S1.** Longitudinal echocardiography examination times during 12-year period.

|             | <b>Times (M)</b> | <b>Times (F)</b> | <b>Total Times</b> |
|-------------|------------------|------------------|--------------------|
| Elderly     | 63               | 111              | 174                |
| CAD         | 278              | 50               | 328                |
| HTN         | 137              | 113              | 250                |
| Total Times | 478              | 274              | 752                |

M, male; F, female; CAD, coronary artery disease; HTN, hypertension.
